# Supplementary material
Source: PubMed Central journal article supplement (PMC7335353)
Supplement: NIHMS1588500-supplement-Supplement.pdf [file NIHMS1588500-supplement-Supplement.pdf]

## Supplementary materials for

### “Patterns and determinants of exhaled nitric oxide trajectories in schoolchildren over a 7-year period”

#### Contents

eMethods: Additional details on the methods

Table E1: Distribution of demographic characteristics in full study population and three subsets

Figure E1: Selected  $F_{E}NO_{50}$  trajectories for participants with 6 measurements

Table E2: Summary of fitted Generalized Additive Mixed Models presented in Figure 1

Table E3: Bayesian Information Criteria for fitted Generalized Additive Mixed Models presented in Table 3

Table E4: Predicted geometric mean  $F_{E}NO_{50}$  (and 95% CI) at ages 8 and 15

Figure E2: Modeled sex-specific trajectories of  $F_{E}NO_{50}$  among participants with age at peak height velocity data

Table E5: Predicted geometric mean  $F_{E}NO_{50}$  (and 95% CI) at selected ages by sex and age at peak height velocity

Table E6: Summary of fitted Generalized Additive Mixed Models using time-varying height

Figure E3: Modeled sex-specific trajectories of  $F_{E}NO_{50}$  as smooth of height by clinical factors

Figure E4: Modeled sex-specific trajectories of  $F_{E}NO_{50}$  by time-varying BMI percentile

Figure E5: Modeled sex-specific trajectories of  $F_{E}NO_{50}$  among participants who never reported allergic rhinitis

Figure E6: Modeled sex-specific trajectories of  $F_{E}NO_{50}$  by clinical factors among participants who never reported allergic rhinitis

Figure E7: Modeled sex-specific trajectories of  $F_{E}NO_{50}$  among participants who never reported wheeze or whistling in the chest

Figure E8: Modeled sex-specific trajectories of  $F_{E}NO_{50}$  by clinical factors among participants who never reported wheeze or whistling in the chest

Figure E9: Modeled sex-specific trajectories of  $F_{E}NO_{50}$  restricting to online  $F_{E}NO_{50}$  measurements

Figure E10: Modeled sex-specific trajectories of  $F_{E}NO_{50}$  by clinical factors restricting to online  $F_{E}NO_{50}$  measurements

Supplementary references Modeled sex-specific trajectories of  $F_{E}NO_{50}$  by clinical factors among participants

## **eMethods: Additional details on the methods**

### *Measurement of Exhaled Nitric Oxide*

In years 5 and 6 five 50mL/s eNO samples were collected per subject and  $F_{E}NO_{50}$  was calculated as the mean of the 2-3 most reproducible plateau estimates within 10%. In years 8 and 10 three 50mL/s eNO samples were collected per subject as part of a multiple flow protocol and  $F_{E}NO_{50}$  was calculated as the mean of 2-3 plateau estimates within 15%.

### *Statistical analysis*

The intra-class correlation of repeated measurements of  $F_{E}NO_{50}$  was calculated using the ratio of between-participant variance to the total variance from sex-specific linear mixed effects models of  $\log F_{E}NO_{50}$  with only a random intercept for participant.

Model fit was assessed by the Bayesian Information Criterion (BIC) [1]. Generalized Additive Mixed Models (GAMMs) were estimated using restricted maximum likelihood except when reporting model fit according to the BIC [1] when we refit models using maximum likelihood.

To determine whether there was evidence for a joint smooth with age and year 3 BMI percentile (a continuous variable), we first fit models using a tensor product interaction, an ANOVA-like decomposition of the joint smooth. Given evidence of an interaction ( $p < 0.05$ ) in either sex, we then refit using the standard tensor product smooth which allows for more flexibility in the smooth surface. For categorical variables (race/ethnicity and year 3 ever reported allergic rhinitis), we fit a model with a single common smooth surface for age in addition to “difference” surfaces for age for each level of the categorical variable using the “by” variable approach in `gamm()`. This parameterization of the model permitted testing whether the smooth for a given group was

different from that of the overall population smooth and allows for potentially only one complex smooth surface to be estimated [2]. We imposed a first order penalty (rather than a second order penalty) on the difference smooths for identifiability, encouraging shrinkage to the mean.

**Table E1:** Distribution of demographic characteristics in full study population and three subsets used in the analyses. N (%), unless otherwise specified.

|                                                       | Full Study<br>Population | Participants Not<br>Missing Year 3<br>BMI | Participants Not<br>Missing Year 3<br>F <sub>E</sub> NO <sub>50</sub> | Participants Not<br>Missing Year 3 or<br>Year 10 F <sub>E</sub> NO <sub>50</sub> |
|-------------------------------------------------------|--------------------------|-------------------------------------------|-----------------------------------------------------------------------|----------------------------------------------------------------------------------|
| Participants                                          | 1791                     | 1717                                      | 1429 <sup>a</sup>                                                     | 681 <sup>b</sup>                                                                 |
| Total observations                                    | 7185                     | 6989                                      | -                                                                     | -                                                                                |
| <i>Observations per participant,<br/>median (IQR)</i> | 4 (2)                    | 4 (2)                                     | -                                                                     | -                                                                                |
| 1                                                     | 214 (11.9%)              | 195 (10.9%)                               |                                                                       |                                                                                  |
| 2                                                     | 163 (9.1%)               | 144 (8.0%)                                |                                                                       |                                                                                  |
| 3                                                     | 236 (13.2%)              | 223 (12.5%)                               |                                                                       |                                                                                  |
| 4                                                     | 344 (19.2%)              | 329 (18.4%)                               |                                                                       |                                                                                  |
| 5                                                     | 443 (24.7%)              | 435 (24.3%)                               |                                                                       |                                                                                  |
| 6                                                     | 391 (21.8%)              | 391 (21.8%)                               |                                                                       |                                                                                  |
| <i>Sex</i>                                            |                          |                                           |                                                                       |                                                                                  |
| Male                                                  | 851 (47.5%)              | 809 (47.1%)                               | 672 (47.0%)                                                           | 318 (46.7%)                                                                      |
| Female                                                | 940 (52.5%)              | 908 (52.9%)                               | 757 (53.0%)                                                           | 363 (53.3%)                                                                      |
| <i>Race</i>                                           |                          |                                           |                                                                       |                                                                                  |
| Hispanic                                              | 1072 (59.9%)             | 1022 (59.5%)                              | 835 (58.4%)                                                           | 380 (55.8%)                                                                      |
| White/non-Hispanic                                    | 525 (29.3%)              | 507 (29.5%)                               | 445 (31.3%)                                                           | 229 (33.6%)                                                                      |
| Black                                                 | 39 (2.2%)                | 39 (2.3%)                                 | 26 (1.8%)                                                             | 10 (1.5%)                                                                        |
| Asian                                                 | 75 (4.2%)                | 73 (4.3%)                                 | 58 (4.1%)                                                             | 25 (3.7%)                                                                        |
| Other                                                 | 71 (4.0%)                | 69 (4.0%)                                 | 60 (4.2%)                                                             | 35 (5.1%)                                                                        |
| Missing                                               | 9 (0.5%)                 | 7 (0.4%)                                  | 5 (0.3%)                                                              | 2 (0.3%)                                                                         |
| <i>Year 3 covariates</i>                              |                          |                                           |                                                                       |                                                                                  |
| F <sub>E</sub> NO <sub>50</sub> , ppb, median (IQR)   | 9.7 (7.6)                | 9.7 (7.6)                                 | 9.7 (7.6)                                                             | 9.7 (7.5)                                                                        |
| Missing*                                              | 362 (20.2%)              | 288 (16.8%)                               | 0                                                                     | 0                                                                                |
| BMI Percentile, median (IQR)                          | 72.7 (48.7)              | 72.7 (48.7)                               | 72.7 (48.7)                                                           | 73.1 (47.4)                                                                      |
| Missing*                                              | 362 (20.2%)              | 288 (16.8%)                               | 0                                                                     | 0                                                                                |
| Ever reported allergic rhinitis                       |                          |                                           |                                                                       |                                                                                  |
| No                                                    | 847 (47.3%)              | 847 (49.3%)                               | 847 (59.3%)                                                           | 418 (61.4%)                                                                      |
| Yes                                                   | 399 (22.3%)              | 399 (22.3%)                               | 399 (27.9%)                                                           | 178 (26.1%)                                                                      |
| Missing*                                              | 545 (30.4%)              | 471 (27.4%)                               | 183 (12.8%)                                                           | 85 (12.5%)                                                                       |
| Related tables/figures                                | Table E2, Figures<br>1-2 | Tables 2-3, Figure<br>3                   | Tables 1a-1b<br>[column 1]                                            | Tables 1a-1b [column<br>2]                                                       |

\* Counts both participants without a year 3 visit and participants with a year 3 visit but who were missing this variable.

<sup>a</sup> Only year 3 data used.

<sup>b</sup> Only year 3 and year 10 data used.

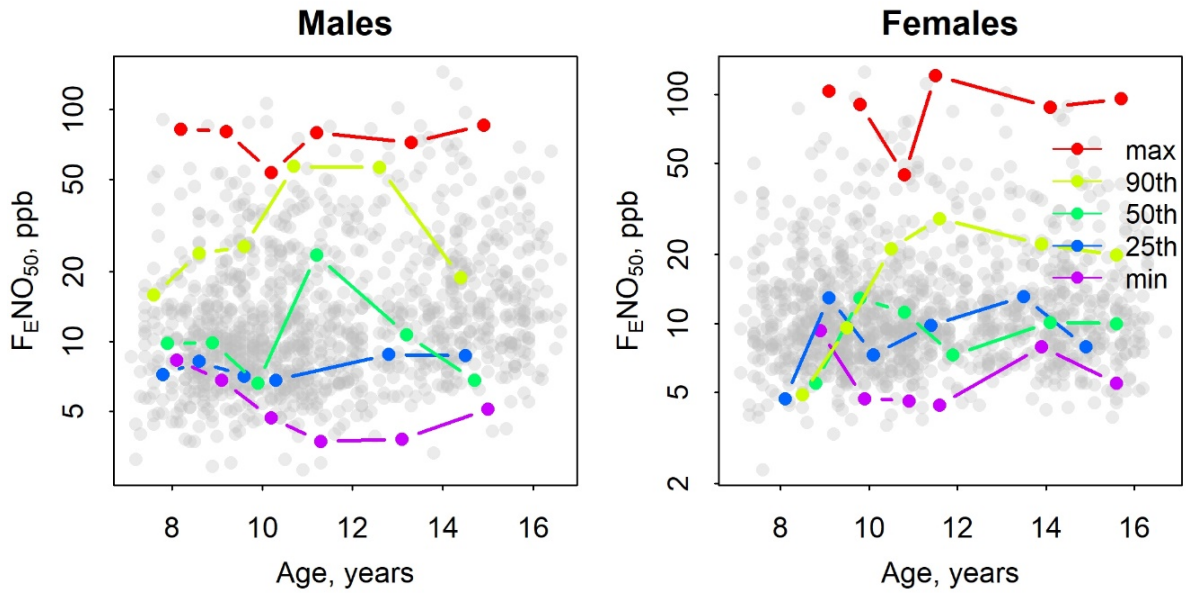

**Figure E1.** Selected F<sub>E</sub>NO<sub>50</sub> trajectories for participants with 6 measurements and whose median detrended residuals of logF<sub>E</sub>NO<sub>50</sub> on age were at selected sex-specific percentiles (min, 25<sup>th</sup>, 50<sup>th</sup>, 90<sup>th</sup> and max).

**Table E2.** Summary of fitted Generalized Additive Mixed Models presented in Figure 1 that model longitudinal logF<sub>E</sub>NO<sub>50</sub> trajectories as smooth functions of: time-varying age (centered at age 8) with a random intercept and slope on age at the participant-level, time-varying height (centered at 130 cm) with a random intercept and slope on height, and two different parameterizations of a joint smooth of age and height with a random intercept and slope on age.

| Model          | Smooth term     | Males (N=851) |         |      | Females (N=940) |         |      |
|----------------|-----------------|---------------|---------|------|-----------------|---------|------|
|                |                 | EDF*          | p-value | BIC† | EDF*            | p-value | BIC† |
| Age only       | s(age)          | 5.7           | <0.0001 | 5539 | 5.1             | <0.0001 | 5688 |
| Height only    | s(height)       | 2.2           | <0.0001 | 5544 | 3.8             | <0.0001 | 5679 |
| Age and height | te(age, height) | 8.8           | <0.0001 | 5554 | 7.9             | <0.0001 | 5701 |
|                | ti(age)         | 1.0           | 0.08    | 5566 | 1.0             | 0.93    | 5713 |
|                | ti(height)      | 1.0           | 0.33    |      | 1.0             | 0.05    |      |
|                | ti(age,height)  | 6.5           | 0.001   |      | 4.7             | 0.0002  |      |

\* Effective degrees of freedom (EDF) for the smooth term; a value of 1 indicates a linear effect, higher values indicate a higher degree of non-linearity

† Bayesian Information Criterion (BIC)

**Table E3.** Bayesian Information Criteria (BIC) for fitted Generalized Additive Mixed Models presented in Table 3 that model longitudinal log fractional exhaled nitric oxide ( $\log F_{E}NO_{50}$ ) trajectories as smooth functions of time-varying age and a time-constant covariate plus a participant-level random intercept and random slope on age. Model fit is measured by the BIC.

| <b>Model</b>                                      | <b>BIC</b>               |                            |
|---------------------------------------------------|--------------------------|----------------------------|
|                                                   | <b>Males<br/>(N=809)</b> | <b>Females<br/>(N=908)</b> |
| Age only                                          | 5338                     | 5580                       |
| Age and year 3 BMI%                               |                          |                            |
| Using a tensor product interaction for BMI%       | 5358                     | 5601                       |
| Using a tensor product smooth for BMI%            | 5369                     | 5616                       |
| Age and race/ethnicity                            | 5367                     | 5616                       |
| Age and ever reported allergic rhinitis at year 3 | 5367                     | 5608                       |
| Full model                                        |                          |                            |
| Using a tensor product interaction for BMI%       | 5368                     | 5615                       |
| Using a tensor product smooth for BMI%            | 5379                     | 5630                       |



**Table E4.** Predicted geometric mean F<sub>E</sub>NO<sub>50</sub> (and 95% CI) at ages 8 and 15, as well as the percent difference from age 8 to age 15, from the sex-specific model with only a smooth function of age and for specific covariate combinations from the sex-specific “final” models including a joint smooth of age and year 3 BMI percentile and adjustments for race/ethnicity and allergic rhinitis status at year 3.

| Sex               | Model                        | Year 3 child characteristics<br>(BMI%, Race/Ethnicity, Allergic rhinitis) |                      |                       |                    |
|-------------------|------------------------------|---------------------------------------------------------------------------|----------------------|-----------------------|--------------------|
|                   |                              | Age 8,<br>Geo. Mean                                                       | Age 15,<br>Geo. Mean | Percent<br>Difference |                    |
| Male              | s(age) only<br>model         |                                                                           | 10.6 (10.1, 11.2)    | 16.5 (15.4, 17.6)     | 54.9 (44.8, 65.8)  |
|                   |                              | 15%, Hispanic, No                                                         | 10.5 (9.3, 11.9)     | 18.9 (16.5, 21.7)     | 80.0 (58.5, 104.4) |
|                   | Final<br>model               | 15%, White/non-Hispanic, No                                               | 9.5 (8.4, 10.8)      | 17.1 (14.9, 19.7)     | 80.0 (58.5, 104.4) |
|                   |                              | 15%, Other, No                                                            | 12.0 (10.1, 14.2)    | 21.6 (18.0, 25.8)     | 80.0 (58.5, 104.4) |
|                   |                              | 15%, Hispanic, Yes                                                        | 12.2 (10.7, 13.9)    | 21.9 (19.0, 25.4)     | 80.0 (58.5, 104.4) |
|                   |                              | 15%, White/non-Hispanic, Yes                                              | 11.0 (9.7, 12.6)     | 19.8 (17.2, 22.9)     | 80.0 (58.5, 104.4) |
|                   |                              | 15%, Other, Yes                                                           | 13.9 (11.7, 16.5)    | 25.0 (20.8, 30.0)     | 80.0 (58.5, 104.4) |
|                   |                              | 95%, Hispanic, No                                                         | 10.4 (9.5, 11.2)     | 15.0 (13.7, 16.5)     | 45.1 (33.5, 57.7)  |
|                   |                              | 95%, White/non-Hispanic, No                                               | 9.4 (8.5, 10.3)      | 13.6 (12.2, 15.1)     | 45.1 (33.5, 57.7)  |
|                   |                              | 95%, Other, No                                                            | 11.8 (10.2, 13.7)    | 17.1 (14.7, 20.0)     | 45.1 (33.5, 57.7)  |
|                   |                              | 95%, Hispanic, Yes                                                        | 12.0 (10.9, 13.3)    | 17.4 (15.6, 19.4)     | 45.1 (33.5, 57.7)  |
|                   |                              | 95%, White/non-Hispanic, Yes                                              | 10.8 (9.7, 12.1)     | 15.7 (14.0, 17.7)     | 45.1 (33.5, 57.7)  |
|                   |                              | 95%, Other, Yes                                                           | 13.6 (11.7, 15.9)    | 19.8 (16.9, 23.3)     | 45.1 (33.5, 57.7)  |
|                   |                              | Female                                                                    | s(age) only<br>model |                       | 10.7 (10.2, 11.2)  |
| 15%, Hispanic, No | 10.1 (9.1, 11.1)             |                                                                           |                      | 13.2 (11.7, 14.9)     | 31.0 (17.3, 46.3)  |
| Final<br>model    | 15%, White/non-Hispanic, No  |                                                                           | 9.4 (8.5, 10.4)      | 12.3 (10.9, 14.0)     | 31.0 (17.3, 46.3)  |
|                   | 15%, Other, No               |                                                                           | 10.6 (9.3, 12.0)     | 13.9 (12.0, 16.1)     | 31.0 (17.3, 46.3)  |
|                   | 15%, Hispanic, Yes           |                                                                           | 11.7 (10.4, 13.0)    | 15.3 (13.4, 17.4)     | 31.0 (17.3, 46.3)  |
|                   | 15%, White/non-Hispanic, Yes |                                                                           | 10.9 (9.7, 12.2)     | 14.3 (12.5, 16.3)     | 31.0 (17.3, 46.3)  |
|                   | 15%, Other, Yes              |                                                                           | 12.3 (10.7, 14.0)    | 16.1 (13.8, 18.7)     | 31.0 (17.3, 46.3)  |
|                   | 95%, Hispanic, No            |                                                                           | 10.8 (10.0, 11.6)    | 12.2 (11.2, 13.4)     | 13.7 (4.9, 23.3)   |
|                   | 95%, White/non-Hispanic, No  |                                                                           | 10.1 (9.2, 11.0)     | 11.4 (10.3, 12.7)     | 13.7 (4.9, 23.3)   |
|                   | 95%, Other, No               |                                                                           | 11.3 (10.1, 12.8)    | 12.9 (11.3, 14.7)     | 13.7 (4.9, 23.3)   |
|                   | 95%, Hispanic, Yes           |                                                                           | 12.5 (11.4, 13.7)    | 14.2 (12.8, 15.7)     | 13.7 (4.9, 23.3)   |
|                   | 95%, White/non-Hispanic, Yes |                                                                           | 11.6 (10.5, 12.9)    | 13.2 (11.8, 14.9)     | 13.7 (4.9, 23.3)   |
|                   | 95%, Other, Yes              |                                                                           | 13.1 (11.6, 14.9)    | 14.9 (13.0, 17.1)     | 13.7 (4.9, 23.3)   |

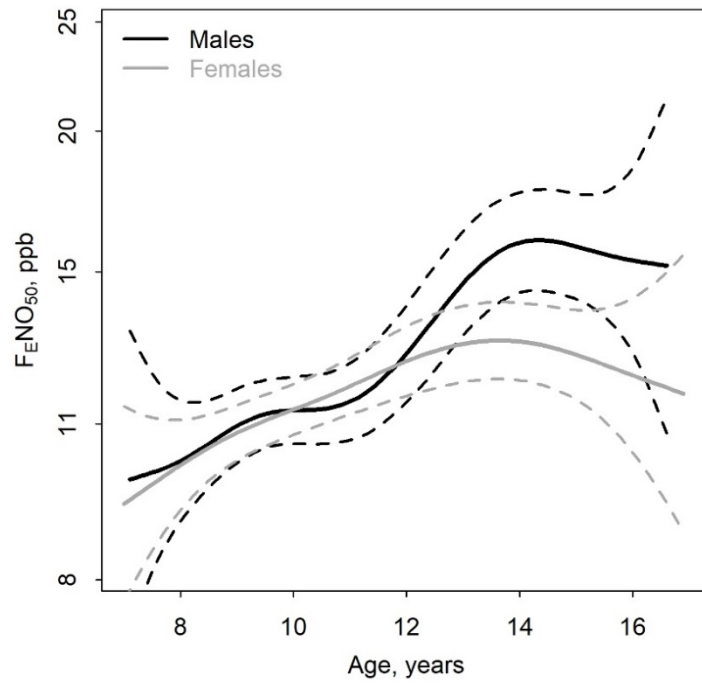

**Figure E2.** Population average sex-specific trajectories of  $F_{E}NO_{50}$  (solid lines) and 95% Confidence Intervals (dashed lines) in subset of participants with data on age at peak height velocity (N=288 males, N=323 females) modeled as a smooth function of age only, for males (black) or females (grey). Analyses performed using  $\log F_{E}NO_{50}$  with results here presented using back-transformed values on an axis scaled using natural log.

**Table E5.** Predicted geometric mean  $F_{E}NO_{50}$  (and 95% CI) at selected ages, from the sex-specific model with a joint smooth of age and year 3 BMI percentile by age at peak height velocity (dichotomized based on sex-specific median) and adjustments for race/ethnicity and allergic rhinitis status at year 3.

| Age (yrs) | Age at Peak Height Velocity |                   |                   |                   |
|-----------|-----------------------------|-------------------|-------------------|-------------------|
|           | Early                       |                   | Late              |                   |
|           | Male                        | Female            | Male              | Female            |
| 9         | 10.3 (8.9, 11.8)            | 10.2 (8.9, 11.6)  | 10.1 (8.8, 11.5)  | 10.3 (9.2, 11.5)  |
| 10        | 11.2 (9.8, 12.9)            | 10.7 (9.4, 12.2)  | 10.6 (9.3, 12.1)  | 10.9 (9.7, 12.1)  |
| 12        | 13.4 (11.6, 15.4)           | 11.7 (10.1, 13.5) | 11.9 (10.4, 13.7) | 11.8 (10.4, 13.3) |
| 14        | 15.9 (13.6, 18.6)           | 11.9 (10.2, 13.9) | 13.6 (11.8, 15.7) | 13.6 (11.9, 15.4) |
| 16        | 18.9 (15.8, 22.7)           | 11.8 (9.7, 14.2)  | 14.6 (12.3, 17.4) | 12.1 (10.2, 14.3) |

**Table E6.** Summary of fitted Generalized Additive Mixed Models that model longitudinal log<sub>F<sub>E</sub></sub>NO<sub>50</sub> trajectories as smooth functions of time-varying **height** and a time-constant covariate. Model fit is measured by the Bayesian Information Criterion (BIC).

| Model                                                | Parameter*                 | Males (N=809)             |      |         |         | Females (N=908)           |      |         |         |
|------------------------------------------------------|----------------------------|---------------------------|------|---------|---------|---------------------------|------|---------|---------|
|                                                      |                            | Regression coefficient ** | EDF† | p-value | BIC     | Regression coefficient ** | EDF† | p-value | BIC     |
| Height only                                          | s(height)                  |                           | 2.0  | <0.0001 | 5339    |                           | 3.7  | <0.0001 | 5571    |
|                                                      | te(height, bmi)            |                           | 5.5  | <0.0001 | 5350    |                           | 6.2  | <0.0001 | 5595    |
| Height and year 3 BMI %                              | ti(height)                 |                           | 1.9  | <0.0001 | 5366    |                           | 3.4  | <0.0001 | 5610    |
|                                                      | ti(bmi)                    |                           | 1.0  | 0.0008  |         |                           | 1.0  | 0.89    |         |
|                                                      | ti(height, bmi)            |                           | 1.0  | 0.03    |         |                           | 1.0  | 0.78    |         |
| Height and race/ethnicity‡                           | Intercept                  | 2.55                      |      | <0.0001 | 5370    | 2.50                      |      | <0.0001 | 5607    |
|                                                      | White/non-Hispanic         | -0.08                     |      | 0.08    |         | -0.07                     |      | 0.11    |         |
|                                                      | Other                      | 0.15                      |      | 0.04    |         | 0.06                      |      | 0.33    |         |
|                                                      | s(height)                  |                           | 1.3  | <0.0001 |         |                           | 3.5  | <0.0001 |         |
|                                                      | s(height:Hispanic)         |                           | <0.1 | 0.31    |         |                           | 1.2  | 0.15    |         |
|                                                      | s(height:White/non-Hisp)   |                           | 1.4  | 0.18    |         |                           | <0.1 | 0.99    |         |
|                                                      | s(height:Other)            |                           | <0.1 | 0.72    |         |                           | <0.1 | 0.36    |         |
| Height and ever reported allergic rhinitis at year 3 | Intercept                  | 2.50                      |      | <0.0001 | 5366    | 2.45                      |      | <0.0001 | 5596    |
|                                                      | Allergic Rhinitis          | 0.15                      |      | 0.001   |         | 0.15                      |      | 0.0002  |         |
|                                                      | Missing                    | -0.01                     |      | 0.92    |         | -0.03                     |      | 0.63    |         |
|                                                      | s(height)                  |                           | 1.0  | <0.0001 |         |                           | 3.7  | <0.0001 |         |
|                                                      | s(height:None)             |                           | 2.5  | 0.04    |         |                           | <0.1 | 0.99    |         |
|                                                      | s(height:AllergicRhinitis) |                           | <0.1 | 0.61    |         |                           | <0.1 | 0.91    |         |
|                                                      | s(height:Missing)          |                           | 1.5  | 0.12    |         |                           | <0.1 | 0.56    |         |
| Full model                                           | Intercept                  | 2.53                      |      | <0.0001 | 5360    | 2.47                      |      | <0.0001 | 5606    |
|                                                      | White/non-Hispanic         | -0.11                     |      | 0.01    |         | -0.08                     |      | 0.05    |         |
|                                                      | Other                      | 0.12                      |      | 0.10    |         | 0.04                      |      | 0.45    |         |
|                                                      | Allergic Rhinitis          | 0.15                      |      | 0.001   |         | 0.16                      |      | 0.0002  |         |
|                                                      | Missing                    | -0.01                     |      | 0.87    |         | -0.04                     |      | 0.52    |         |
|                                                      | te(height, bmi)            |                           | 5.0  | <0.0001 |         |                           | 6.3  | <0.0001 |         |
|                                                      |                            | Intercept                 | 2.53 |         | <0.0001 | 5376                      | 2.47 |         | <0.0001 |
|                                                      | White/non-Hispanic         | -0.11                     |      | 0.01    |         | -0.08                     |      | 0.05    |         |
|                                                      | Other                      | 0.12                      |      | 0.10    |         | 0.04                      |      | 0.46    |         |
|                                                      | Allergic Rhinitis          | 0.14                      |      | 0.001   |         | 0.16                      |      | 0.0002  |         |
|                                                      | Missing                    | -0.01                     |      | 0.87    |         | -0.04                     |      | 0.52    |         |
|                                                      | ti(height)                 |                           | 1.9  | <0.0001 |         |                           | 3.4  | <0.0001 |         |
|                                                      | ti(bmi)                    |                           | 1.0  | 0.0005  |         |                           | 1.0  | 0.87    |         |
|                                                      | ti(height, bmi)            |                           | 1.2  | 0.03    |         |                           | 1.0  | 0.71    |         |

\* Smooth terms definitions: s(): penalized regression spline; ti():tensor product interaction; te():tensor product smooth.

\*\* For categorical variables; on log<sub>F<sub>E</sub></sub>NO<sub>50</sub> scale

† Effective degrees of freedom (EDF) for the smooth term; a value of 1 indicates a linear effect, higher values indicate a higher degree of non-linearity

‡ k=5 specified in the s(age, by=race, m=1, k=5) term for improved model convergence

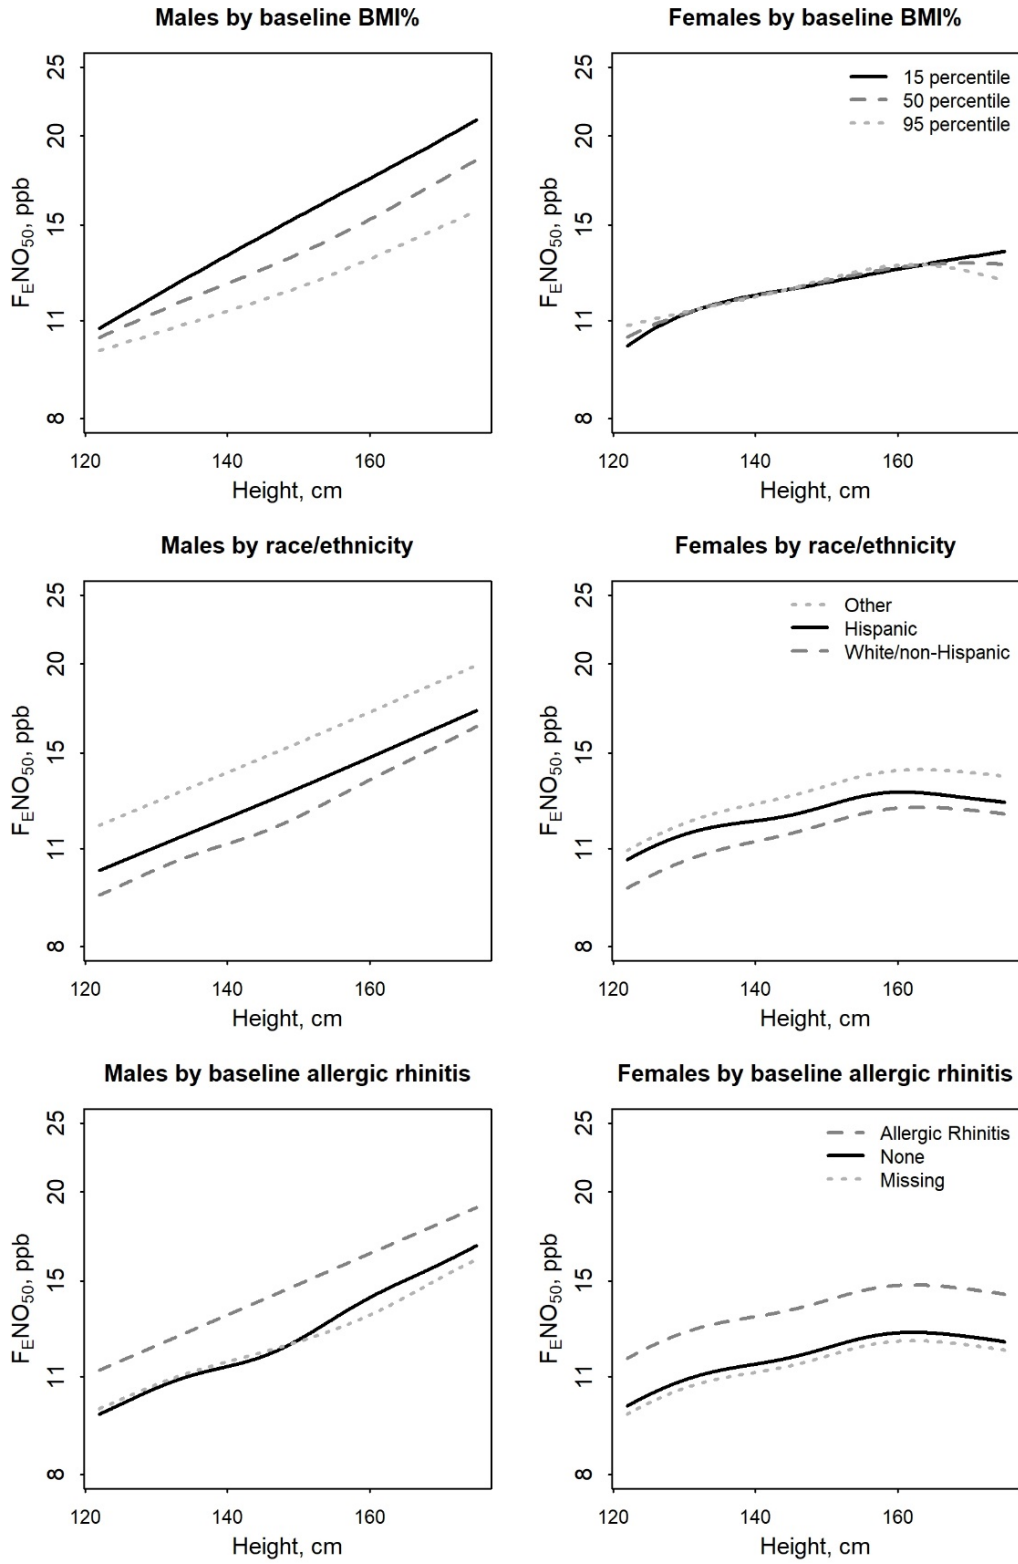

**Figure E3.** Modeled sex-specific trajectory of  $F_{E}NO_{50}$  as a joint smooth of **height** and year 3 BMI percentile or as smooths of **height** that vary by race/ethnicity or ever reported allergic rhinitis at year 3.

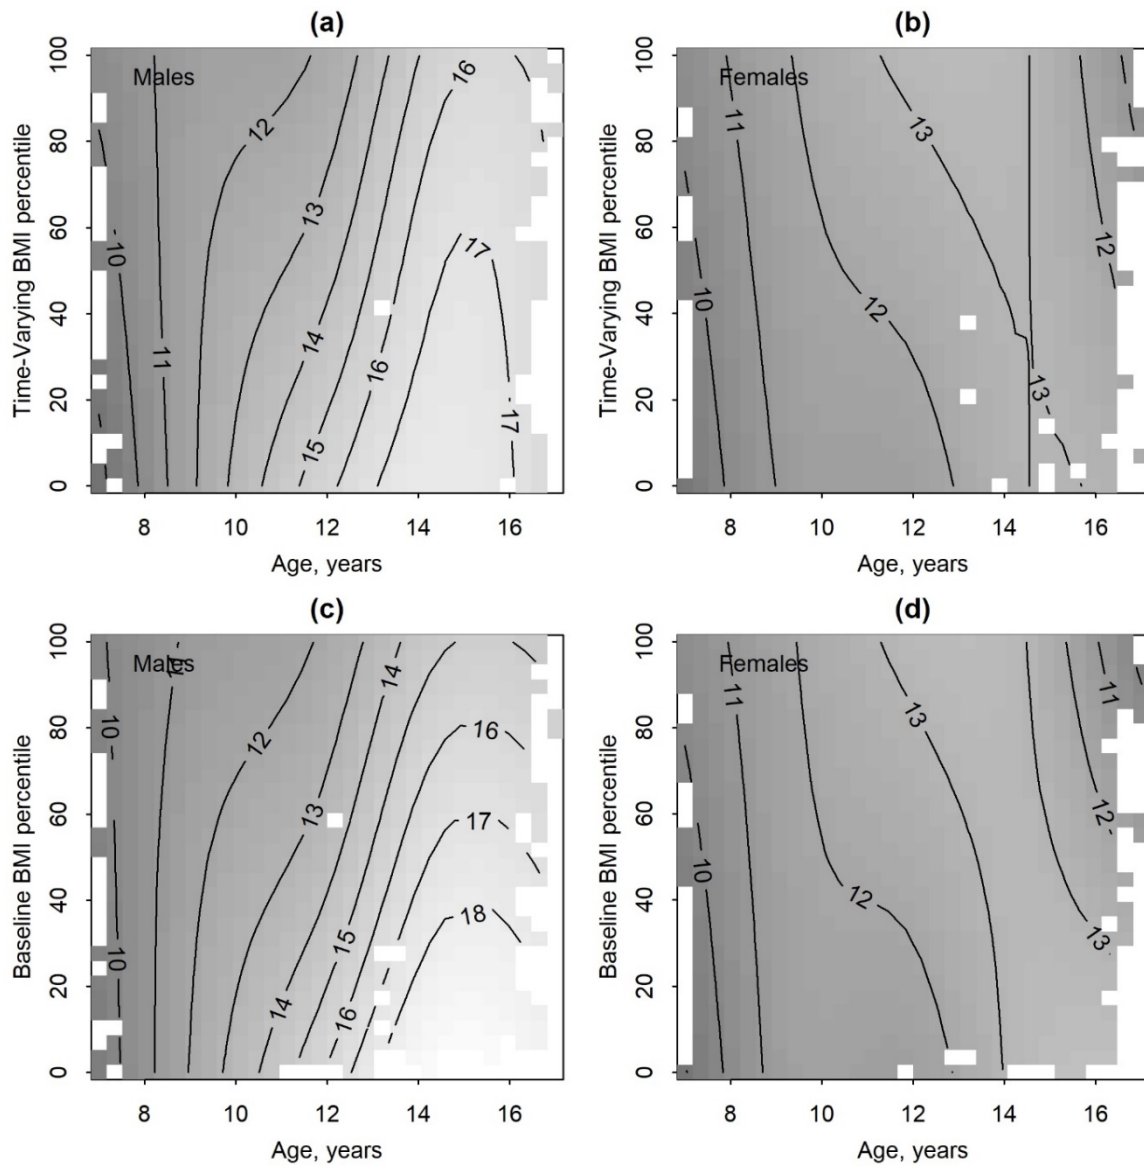

**Figure E4.** Modeled sex-specific trajectory of  $F_{E}NO_{50}$  as a joint smooth of age and time-varying BMI percentile for males (a) or females (b) (N=851 males, N=940 females), or a joint smooth of age and year 3 BMI percentile for males (c) or females (d) (N=809 males, N=908 females). The contour lines labels refer to predicted geometric mean  $F_{E}NO_{50}$  in ppb. Analyses performed using  $\log F_{E}NO_{50}$  with results here presented using back-transformed values on an axis scaled using natural log.

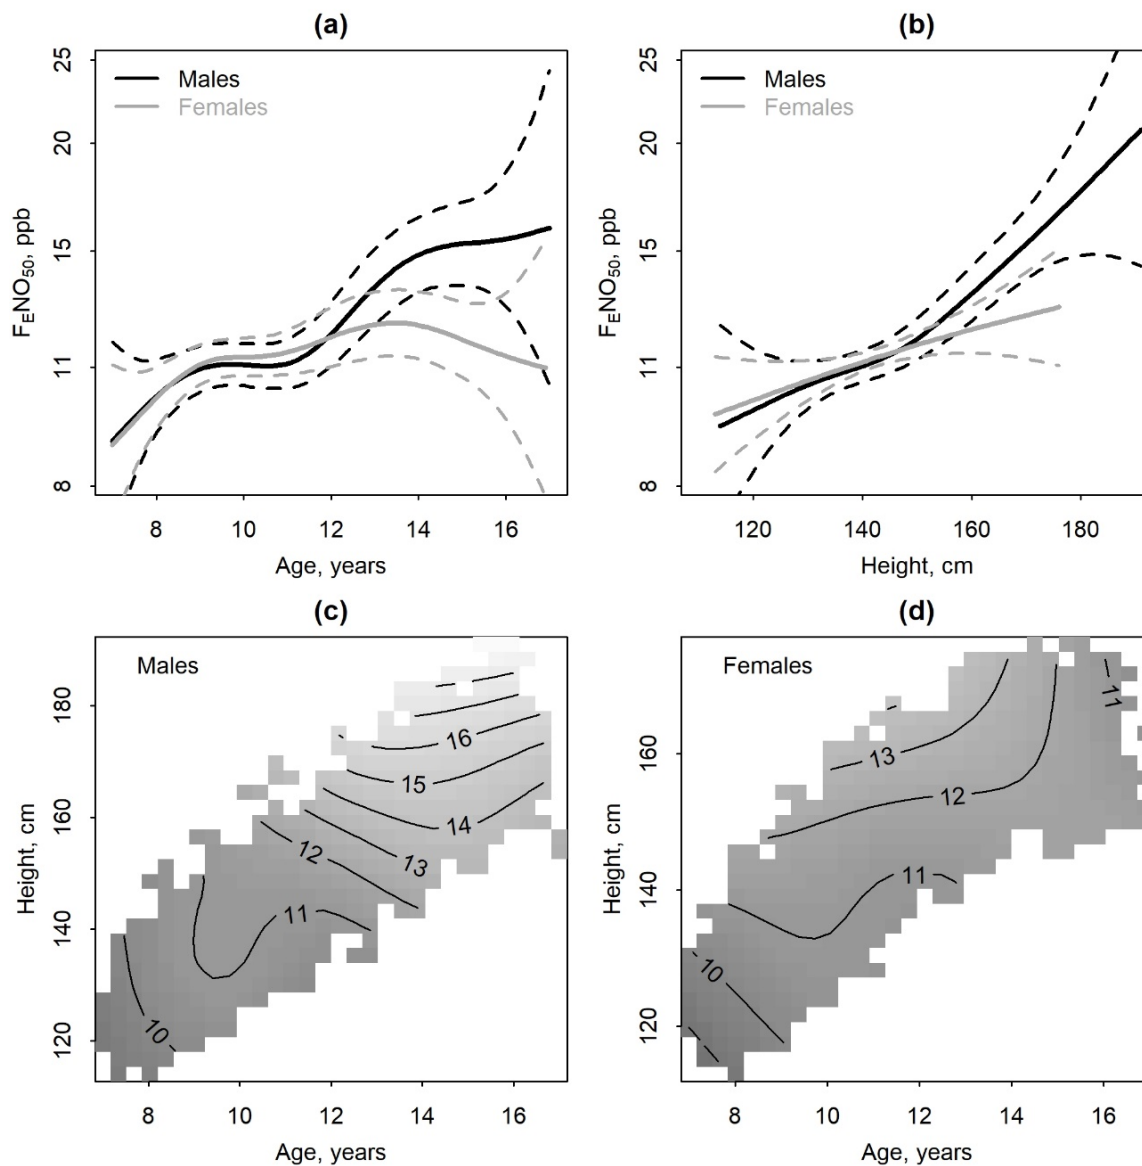

**Figure E5.** Modeled sex-specific trajectory of  $F_{E}NO_{50}$  as a: (a) smooth function of age only\*, (b) a smooth function of height only\*, or a joint smooth of age and height for males (c) or females (d) among participants who never reported allergic rhinitis through year 10 of the study (N=512 males, N=550 females).

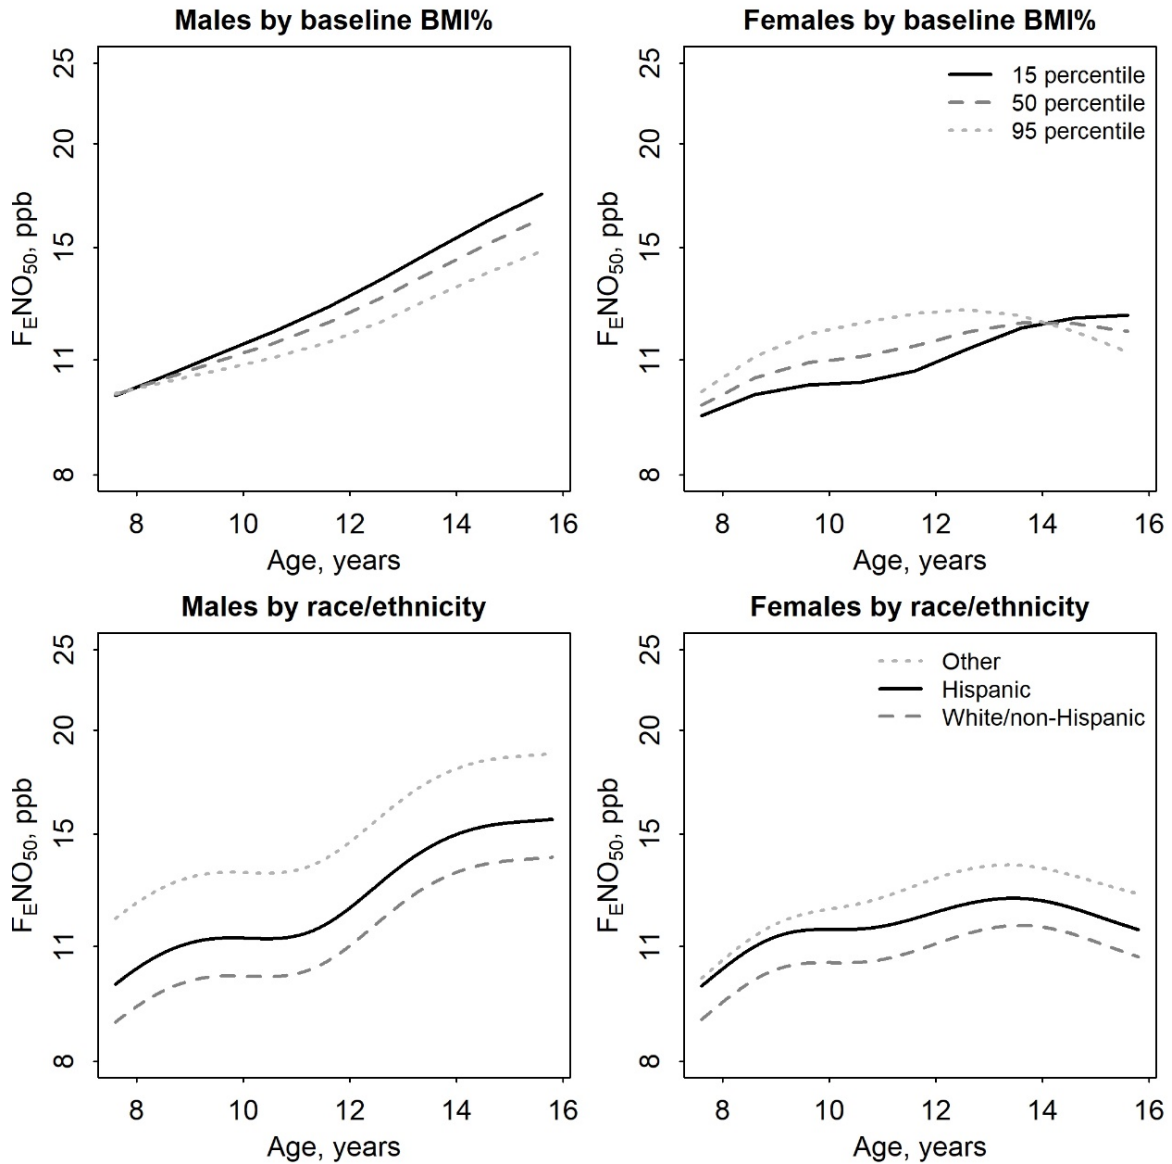

**Figure E6.** Modeled sex-specific trajectory of  $F_{E}NO_{50}$  as a joint smooth of age and year 3 BMI percentile or as smooths of age that vary by race/ethnicity among participants who never reported allergic rhinitis through year 10 of the study and without missing year 3 BMI percentile (N=485 males, N=527 females).



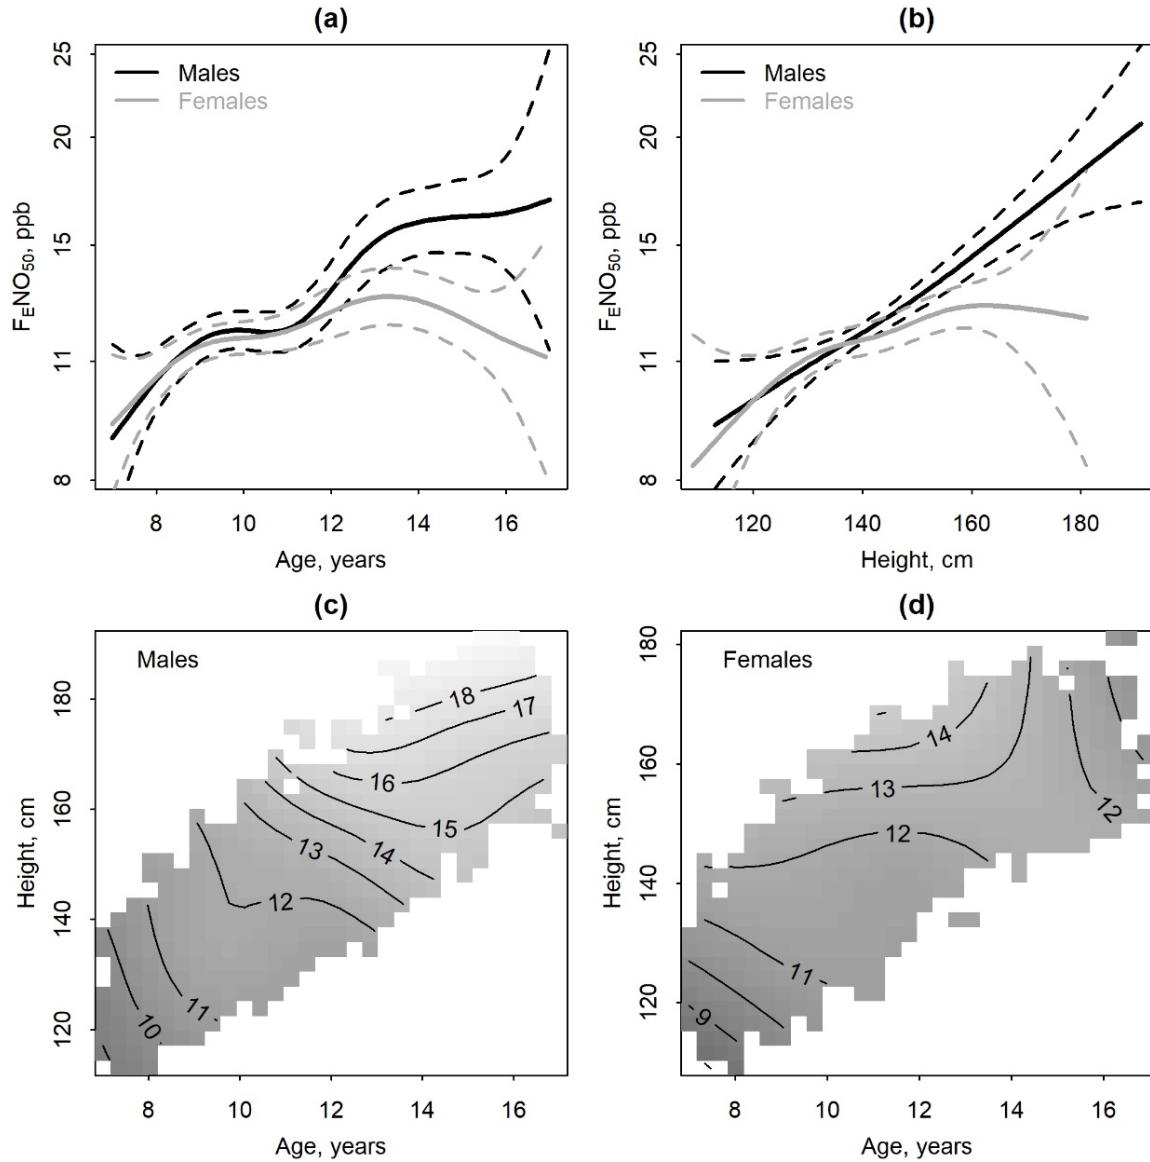

**Figure E7.** Modeled sex-specific trajectory of  $F_{E}NO_{50}$  as a: (a) smooth function of age only\*, (b) a smooth function of height only\*, or a joint smooth of age and height for males (c) or females (d) among participants who never reported wheeze or whistling in the chest through year 10 of the study (N=735 males, N=791 females).

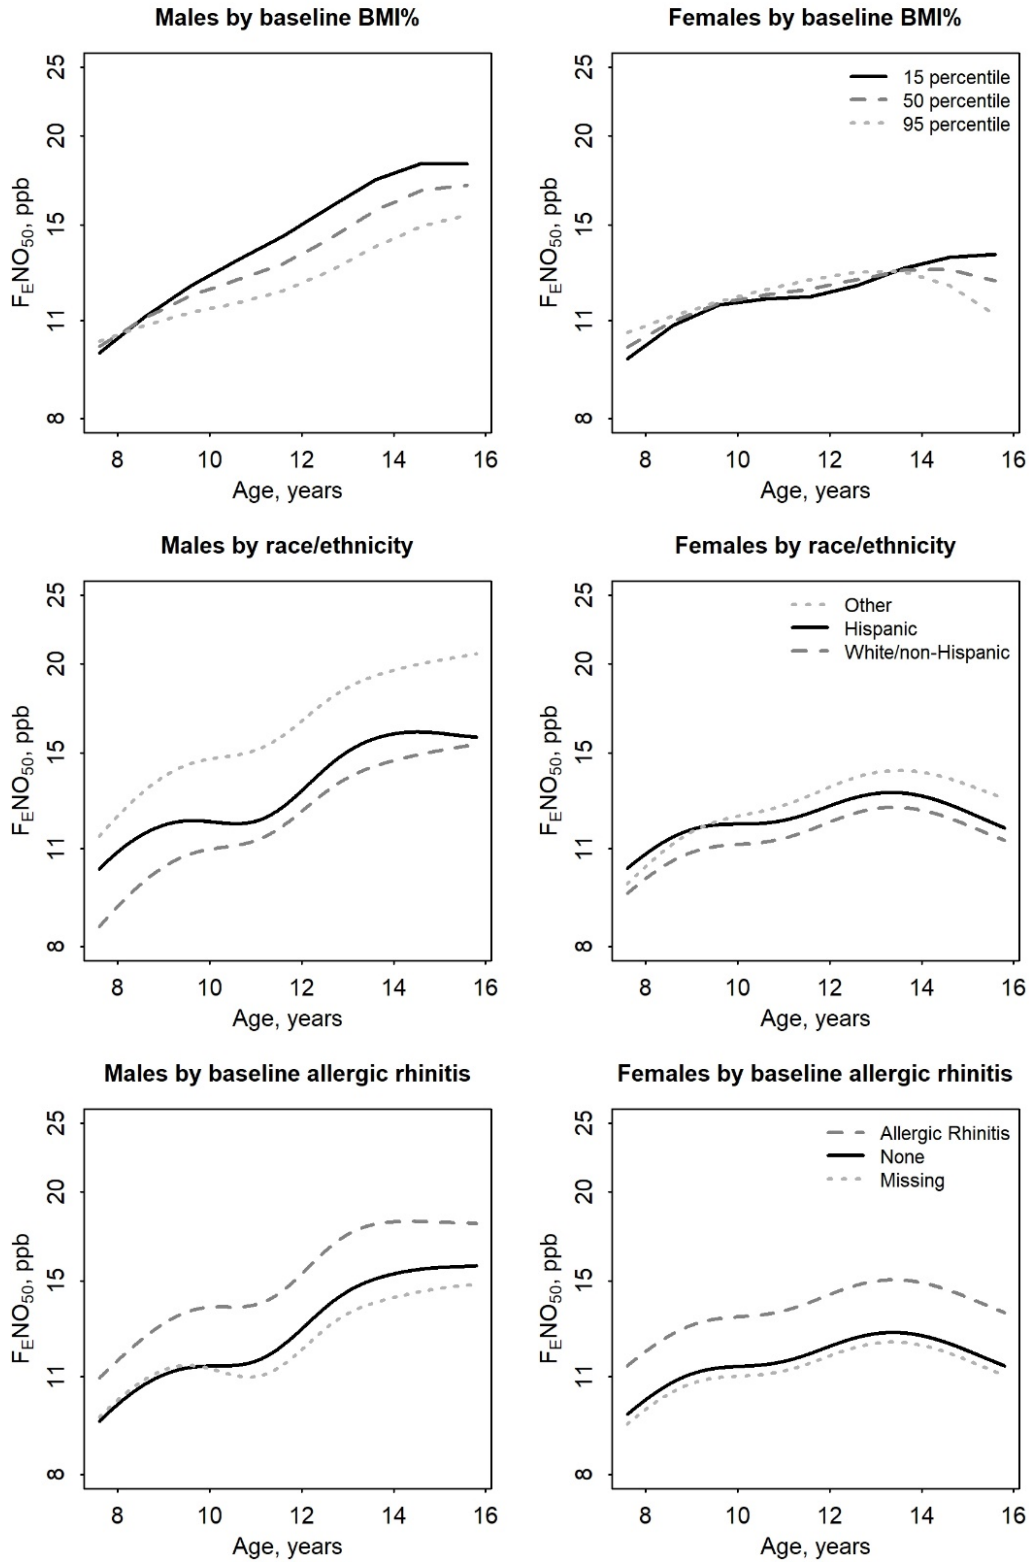

**Figure E8.** Modeled sex-specific trajectory of F<sub>E</sub>NO<sub>50</sub> as a joint smooth of age and year 3 BMI percentile or as smooths of age that vary by race/ethnicity among participants who never reported wheeze or whistling in the chest through year 10 of the study and without missing year 3 BMI percentile (N=697 males, N=768 females).

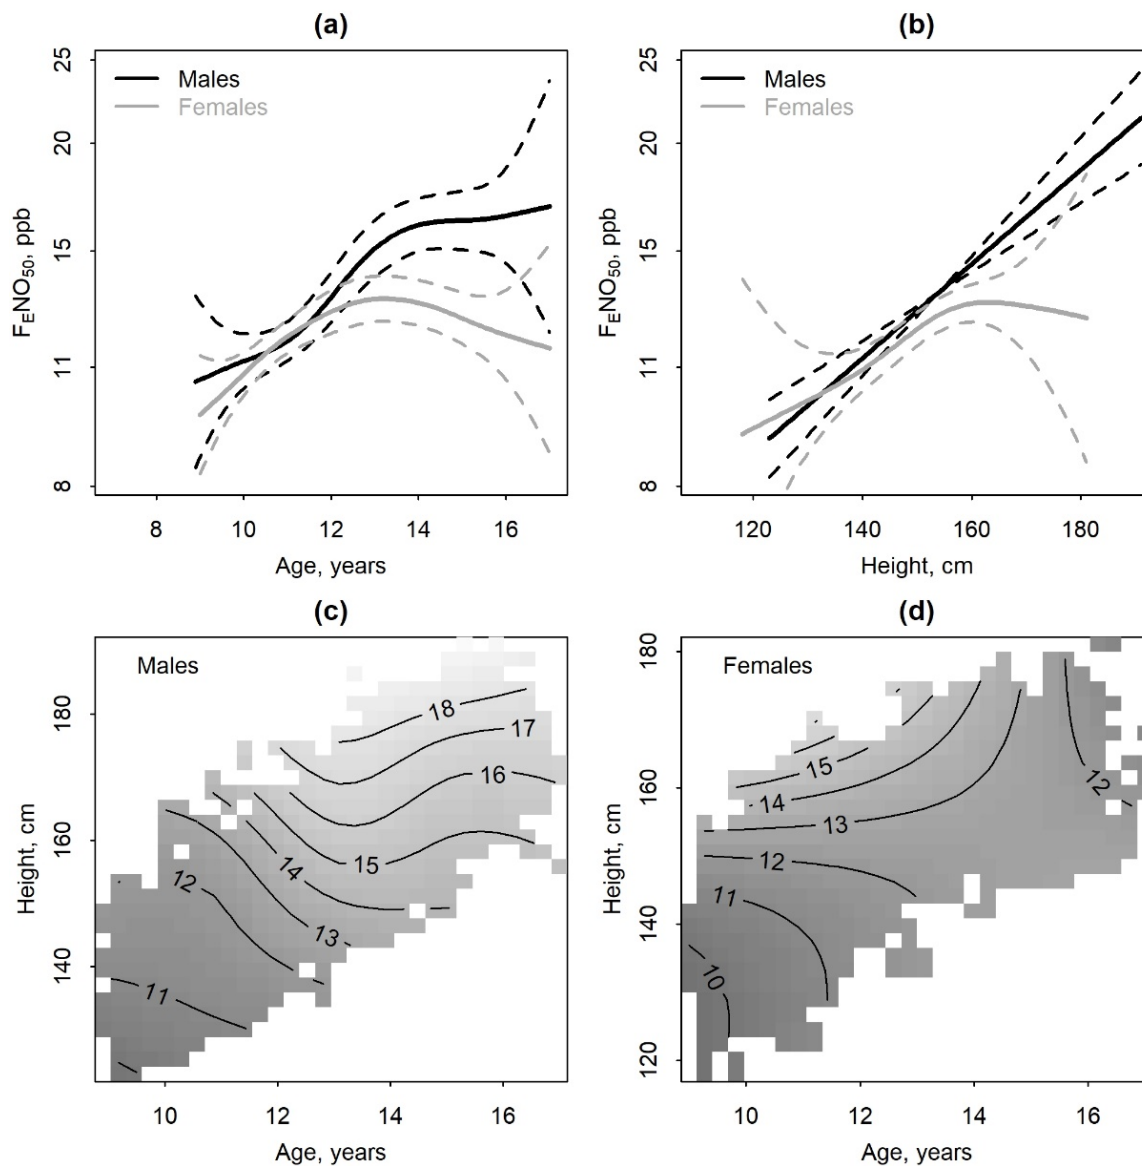

**Figure E9.** Modeled sex-specific trajectory of  $F_E NO_{50}$  as a: (a) smooth function of age only\*, (b) a smooth function of height only\*, or a joint smooth of age and height for males (c) or females (d) restricting to online  $F_E NO_{50}$  measurements (N=740 males, N=818 females).

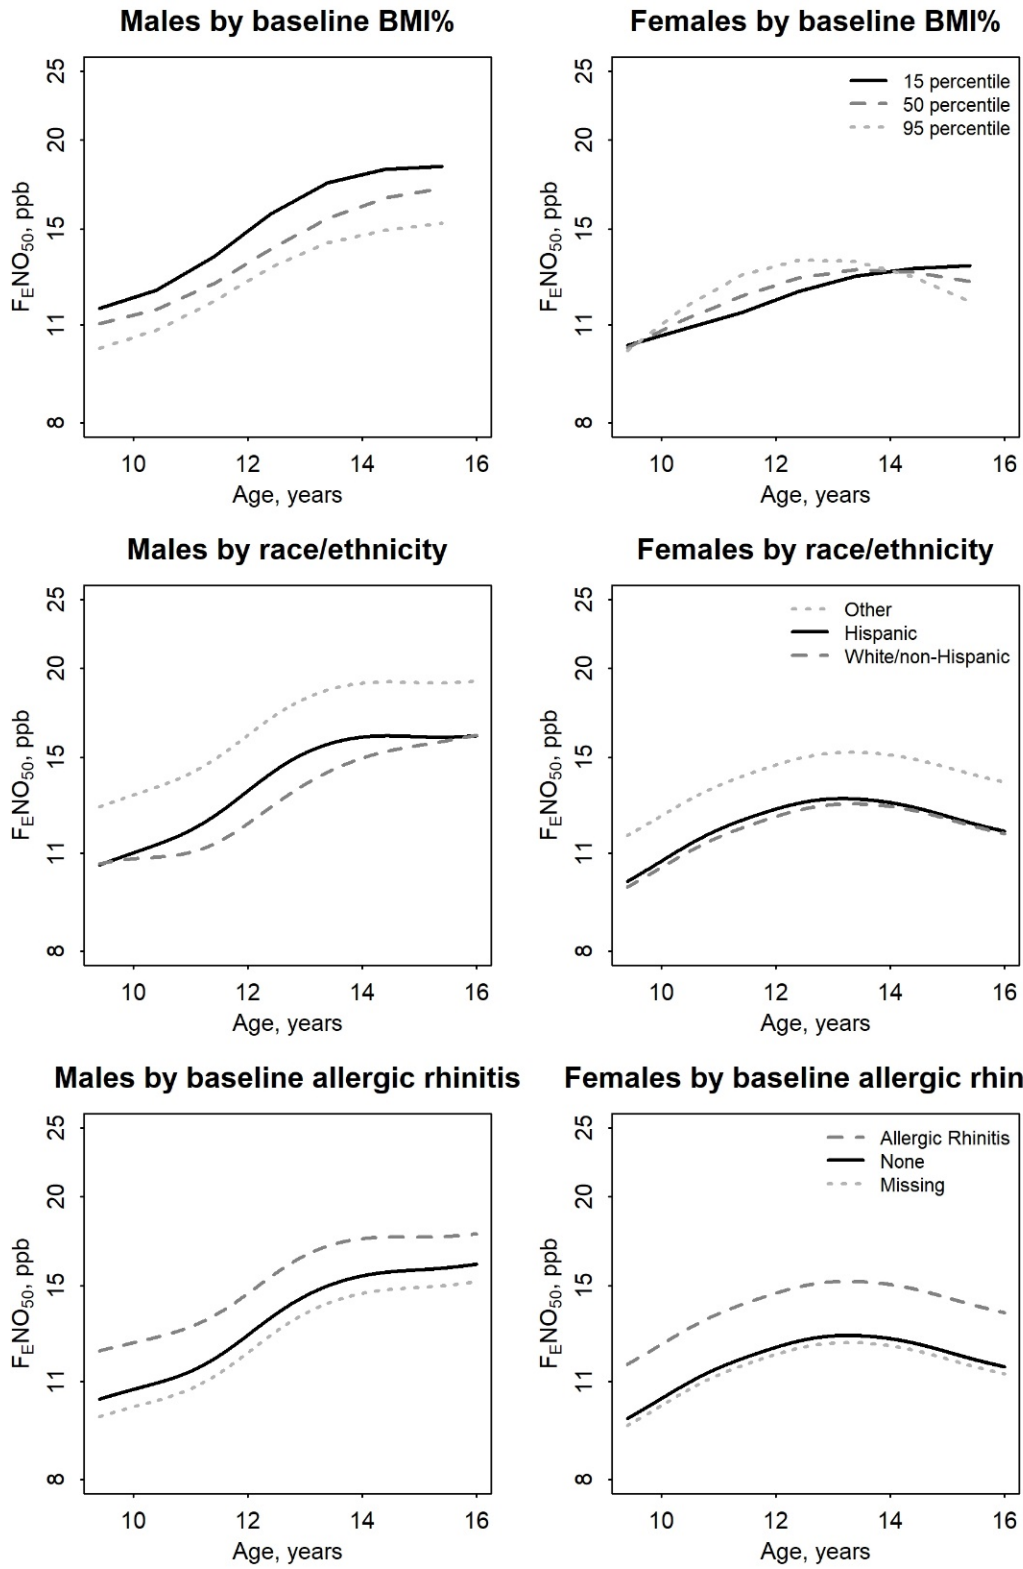

**Figure E10.** Modeled sex-specific trajectory of  $F_{E}NO_{50}$  as a joint smooth of age and year 3 BMI percentile or as smooths of age that vary by race/ethnicity among participants without missing year 3 BMI percentile and restricting to online  $F_{E}NO_{50}$  measurements (N=700 males, N=788 females).

### Supplementary references

1. Gurka MJ. Selecting the best linear mixed model under REML. *The American Statistician* 2006; 60(1): 19-26.
2. Wood SN. Generalized additive models: an introduction with R. CRC press, 2017.
